# Supplementary material
Source: publisher figshare collection journal article supplement (https://acs.figshare.com/ndownloader/files/17519609)

Data Distribution Pie Chart

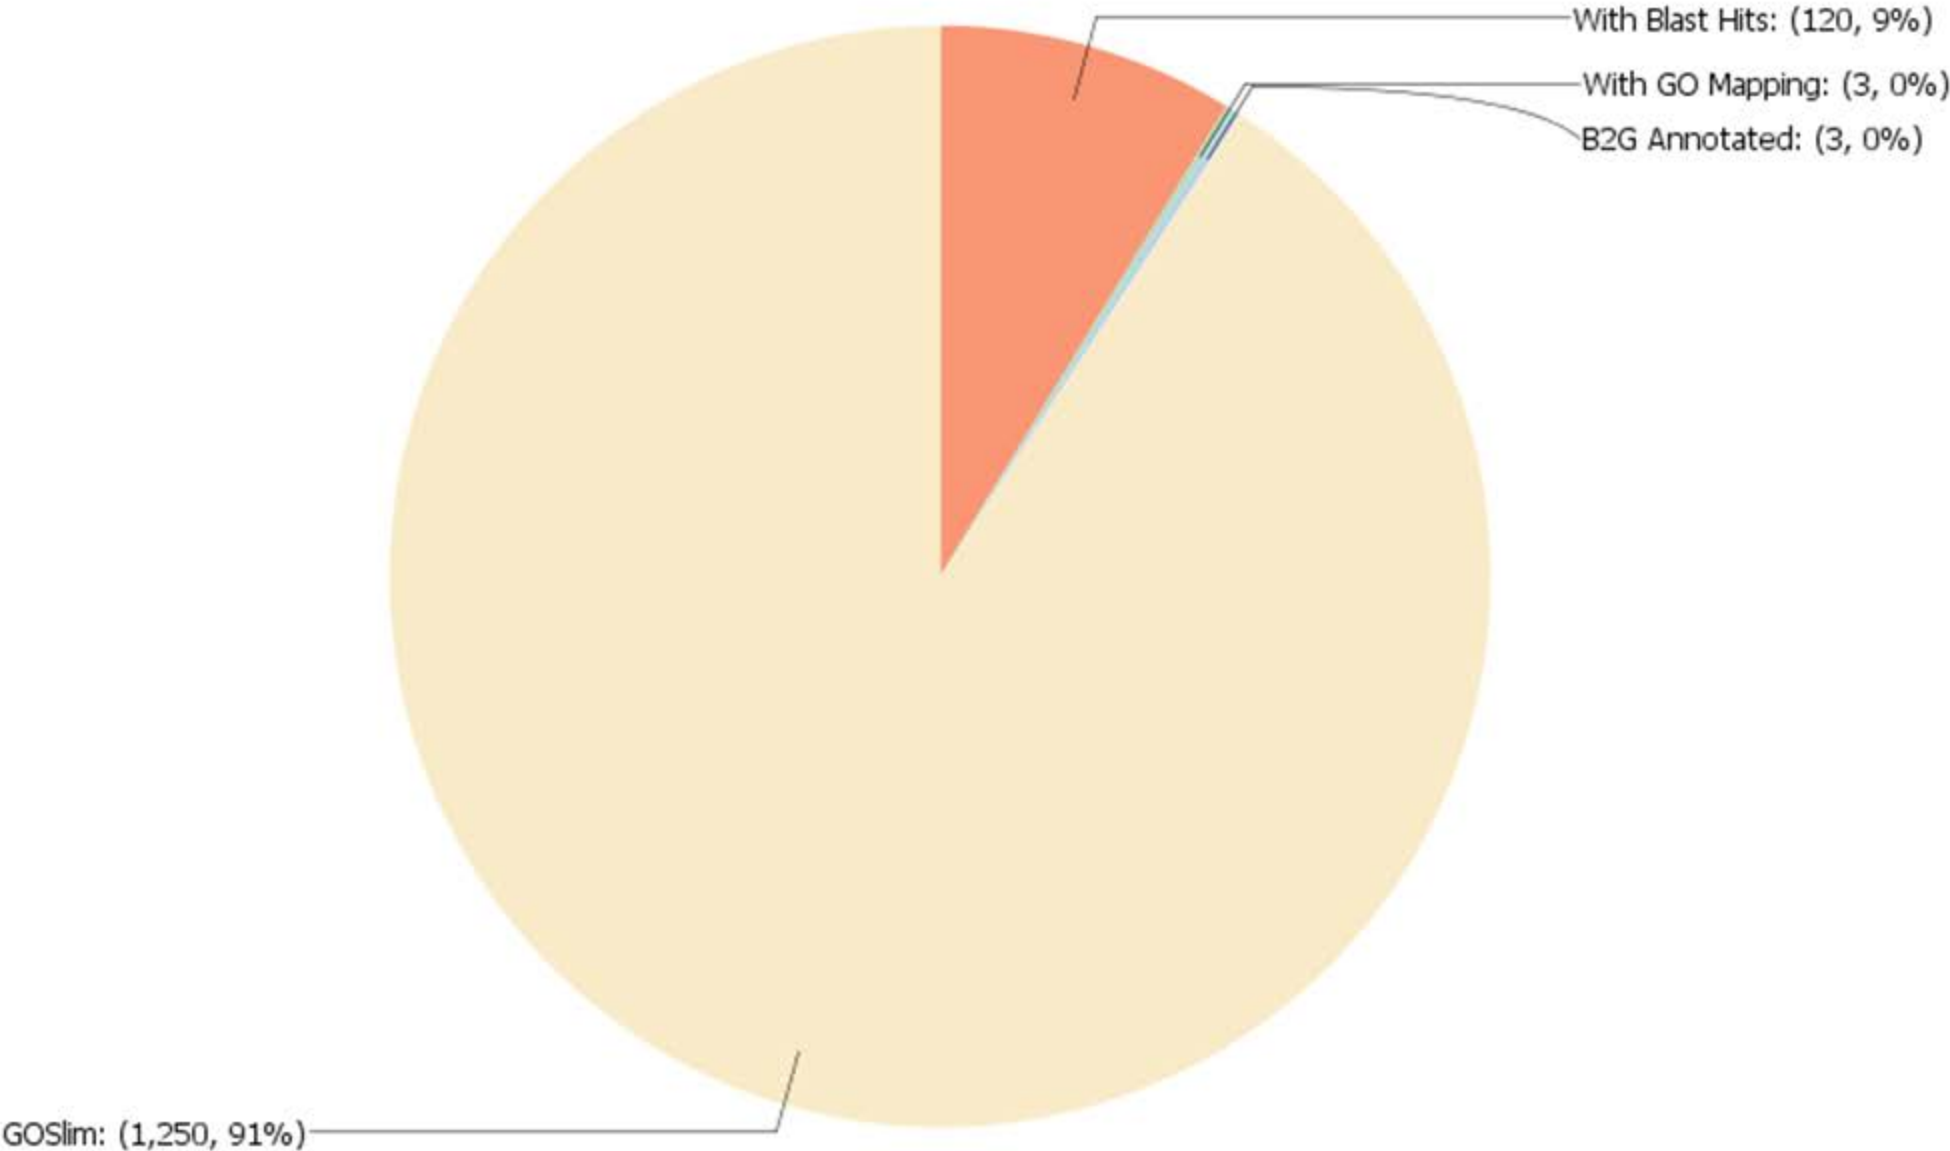

Supplement: Supplementary file 1 [file 17519609]
